# Supplementary material for: Addressing cellular heterogeneity in tumor and circulation for refined prognostication
Source: PubMed Central journal article supplement — Proc Natl Acad Sci U S A. 2019 Aug 15;116(36):17957–62. doi: 10.1073/pnas.1907904116 (PMC6731691; doi:10.1073/pnas.1907904116), 2019-08-15
Supplement: pnas.1907904116.sapp.pdf [file pnas.1907904116.sapp.pdf]

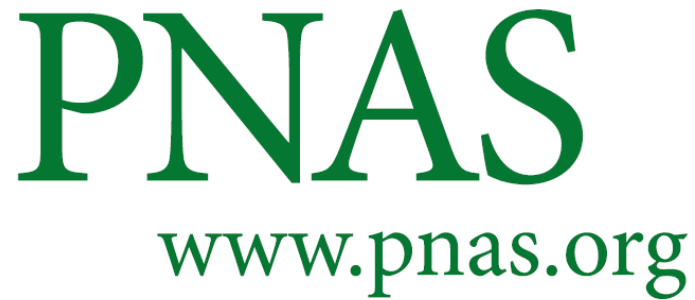

Supplementary Information for

Addressing Cellular Heterogeneity in Tumor and Circulation for Refined Prognostication

Su Bin Lim, Trifanny Yeo, Wen Di Lee, Ali Asgar Bhagat, Swee Jin Tan, Daniel S. W. Tan, Wan-Teck Lim, Chwee Teck Lim

Corresponding author: Chwee Teck Lim  
Email: [ctlim@nus.edu.sg](mailto:ctlim@nus.edu.sg)

**This PDF file includes:**

SI Materials and Methods  
Figures S1 to S22  
Tables S1 to S8  
SI References

## SI Materials and Methods

### Cell culture

Both metastatic (H1650, H2009, and H1792) and non-metastatic (A549, H1975, H2228 and H2291) lung adenocarcinoma cancer cell lines were kept at 37°C conditions with 5% CO<sub>2</sub>, and allowed to achieve 80% confluency in T25 flasks before passaging. Cell lines were cultured in RPMI-1640 medium (Gibco™, ThermoFisher) except for H2009, which was maintained using DMEM:F12 basal medium (Gibco™, ThermoFisher). 0.25% Trypsin was used to detach the cells and centrifuge speed was set at 200 x g for 5 minutes during sub-culturing. Cells were resuspended in 1x PBS and diluted to achieve 80,000 cells/mL.

### Primer design and multiplex gene panel

Primer pairs for preamplification and quantification were previously validated, except for few genes which were designed using Primer-BLAST (<http://www.ncbi.nlm.nih.gov/tools/primer-blast>), and *in-silico* validated with UCSC In-Silico PCR (<http://genome.ucsc.edu/cgi-bin/hgPcr>). Forward and reverse sequences, reference, and length of each primer (bp) are listed in SI Appendix, Table S5. All primers were purchased from Integrated DNA Technologies unmodified with standard desalting. PCR-based multiplex preamplification protocol was developed using A549, MCF7, and MDA-MB-231 cancer cell lines. Validation of PCR performance and primer specificity of the multiplex PCR was done through melting curve analysis and/or gel electrophoresis. Amplified PCR products were run on a 2% agarose gel in 1x TAE buffer (all Life Technologies) stained with SYBR Safe (Life Technologies). The size of each amplicons was visualized and confirmed with GeneRuler 100bp DNA Ladder (Thermo Scientific).

### ROC, AUC, and survival analyses

The area under the receiver operating characteristic (ROC) curve (AUC), sensitivity and specificity based on the best threshold were computed using the *pROC* package (1) in R. Univariate and multivariate Cox regression survival analyses were performed using the *survival* package in R. Hazard ratios (HRs) were adjusted for available clinical features in TCGA dataset (LUAD), including age at initial pathologic diagnosis, smoking status, AJCC pathologic stage, and gender.

### Batch-effect correction and PCA

Batch-effect of CTC qPCR data was adjusted using the *ComBat* function from the *sva* package in R (2). PCA was performed using the *prcomp* function from the default *stats* package. The first two PCs were visualized with the *ggbiplot* package (<https://github.com/vqv/ggbiplot>).

# Supplementary Figures

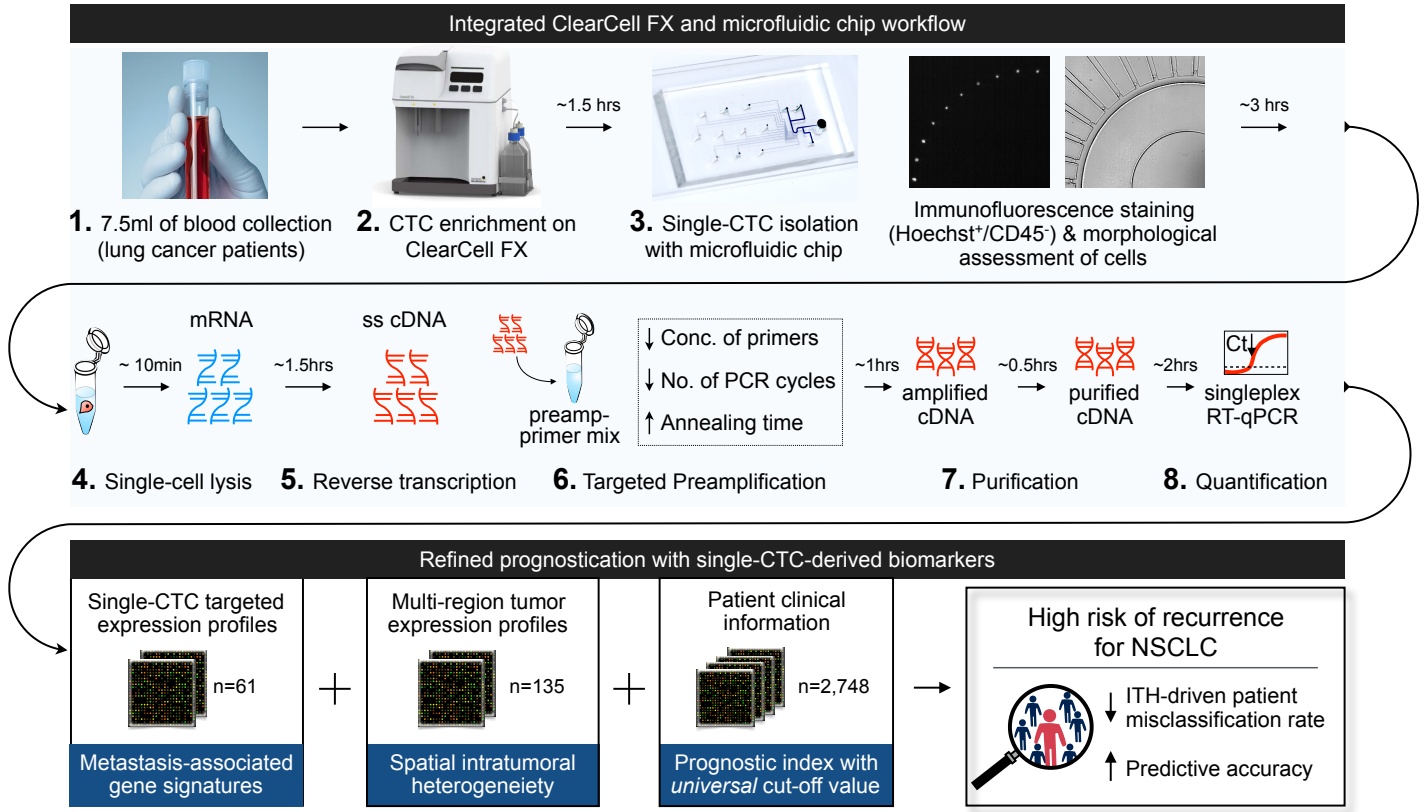

**Fig. S1.** Schematic of integrated workflow and study design. Top: integrated ClearCell FX and microfluidic chip workflow for single-cell analysis of CTCs. Bottom: big data approaches for refining prognostication with single-CTC-derived gene signatures and spatial intratumoral heterogeneity (ITH).

Multi-region profiling data

Study 1: 80 tumor sectors & 20 normal  
Study 2: 35 tumor sectors

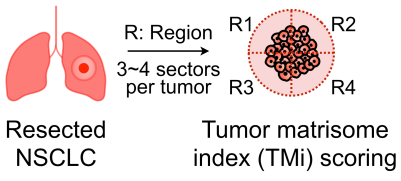

**Fig. S2.** Schematic outline of multi-region profiling data analysis.



### TMi stratification

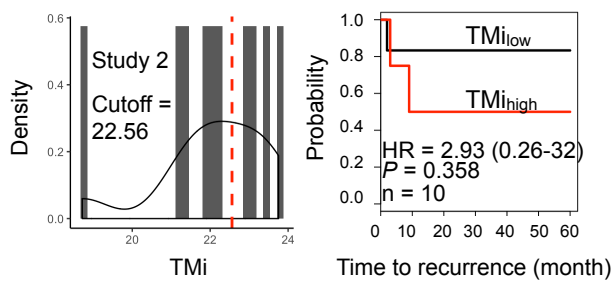

| Group               | n | Events (Recurrence) | median | 0.95 CL (lower) | 0.95 CL (upper) |
|---------------------|---|---------------------|--------|-----------------|-----------------|
| TMi <sub>low</sub>  | 6 | 1                   | NA     | NA              | NA              |
| TMi <sub>high</sub> | 4 | 2                   | 9      | 3               | NA              |

**Fig. S3.** Patient-level prognostic accuracy of TMi in Study 2. Gaussian kernel density distribution (left) and Kaplan-Meier survival curves (right) are drawn. The optimal cutoff value was used for patient stratification. Hazard ratio (HR), log-rank *P*-value, and the number of patients successfully stratified (*n*) are stated. The resulting summary statistics is shown below.

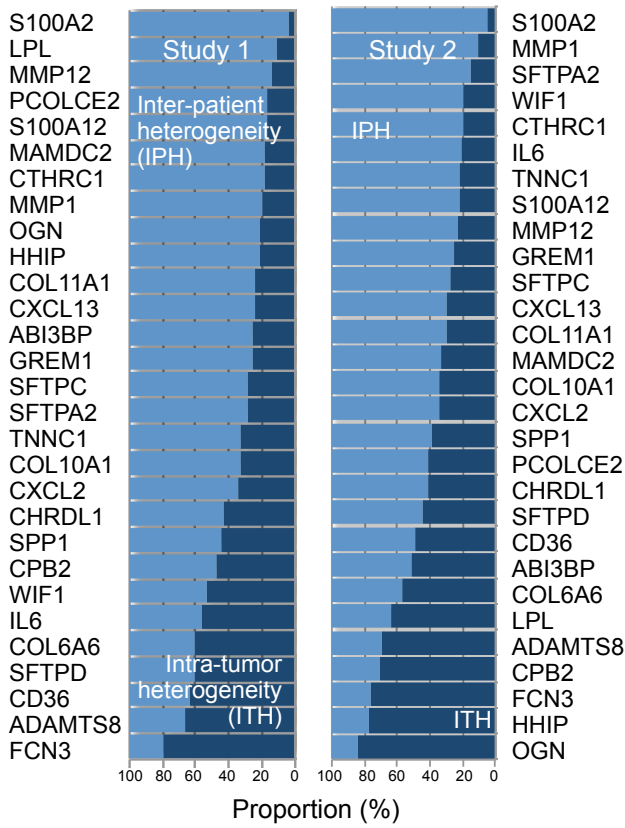

**Fig. S4.** ITH and IPH of each matresome gene. Genes are ordered by increasing ITH.

Patient 3 (Study 2)

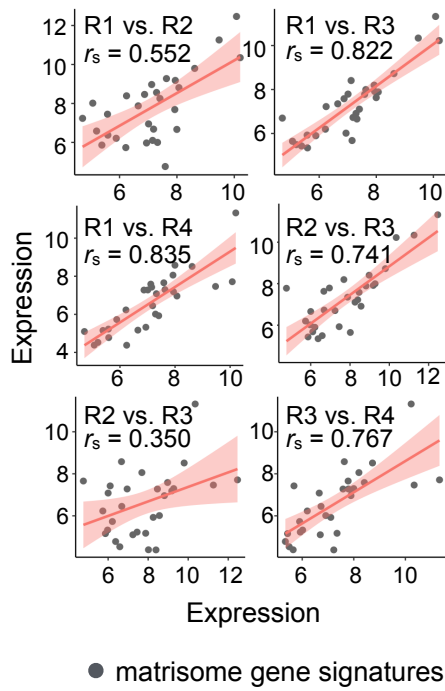

**Fig. S5.** All pairwise matrisome gene expression correlations for Patient 3 from Study 2. Spearman's rank correlation rho ( $r_s$ ) values and linear regression lines with 95% CI are shown.

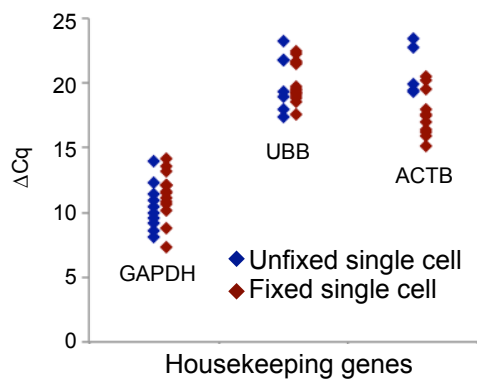

**Fig. S6.** Impact of 1% PFA on single-cell mRNA expression. Cq values of three housekeeping genes are shown for unfixed and fixed single A549 cells. The putative effects of 1% PFA fixation on mRNA expression was assessed with three housekeeping genes (GAPDH, UBB, and ACTB). A549 lung cancer cells were subjected to the same optimized workflow – from microfluidic enrichment of single cells to preamp-purification-quantification of the extracted RNAs. Three independent experiments were performed in duplicates.

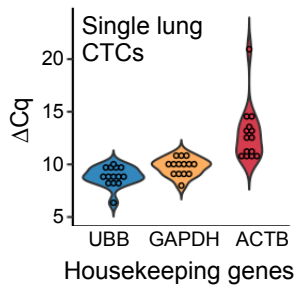

**Fig. S7.** Three housekeeping gene expression from 14 single patient-derived CTCs.

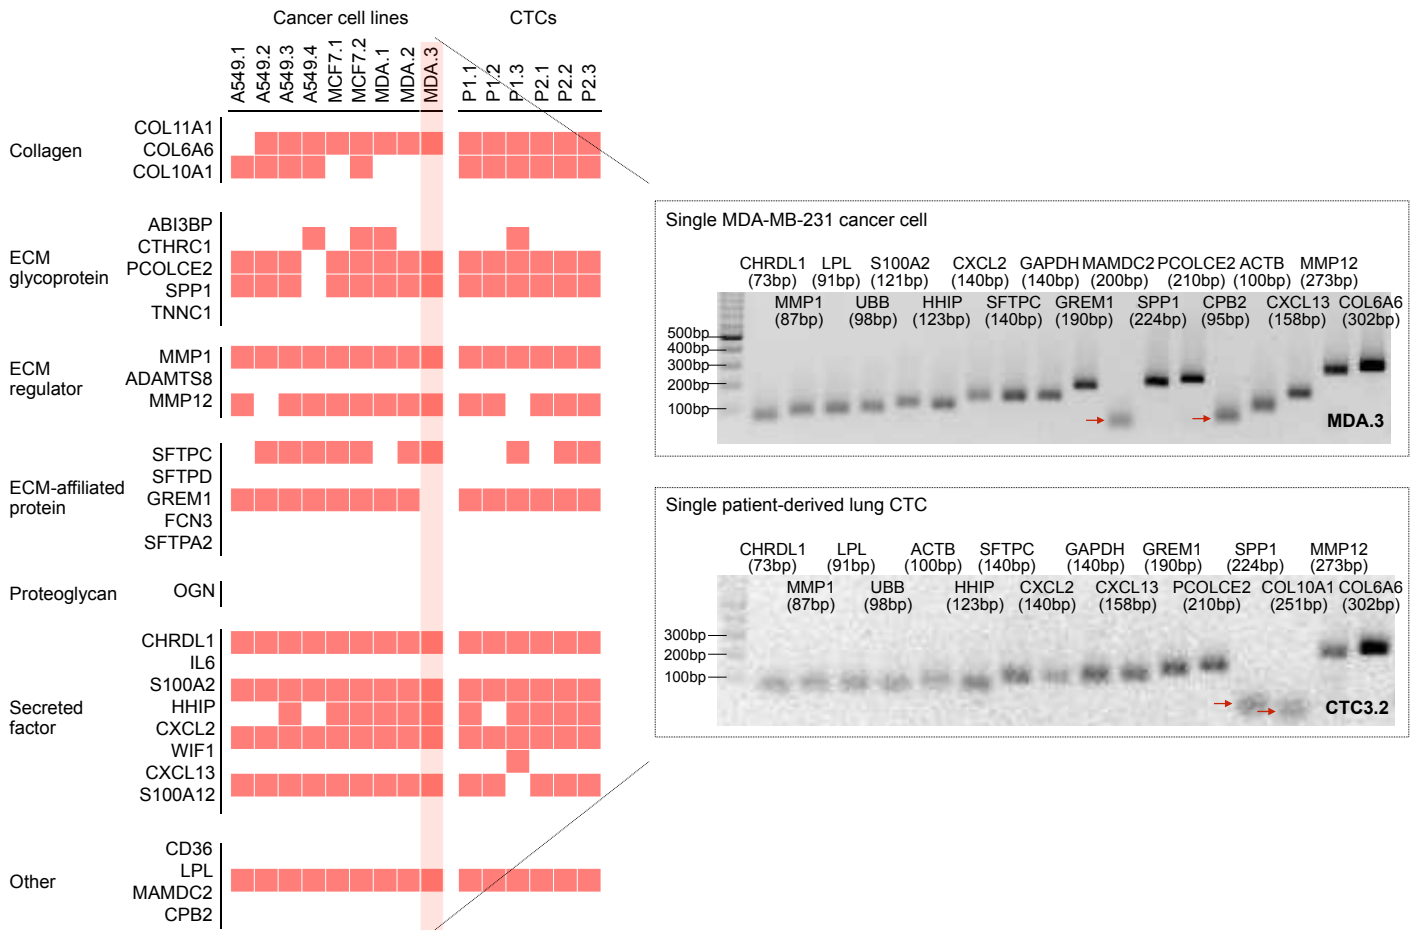

**Fig. S8.** Initial screening of 29 matrisome genes using single A549, MCF7, and MDA-MB-231 cancer cell lines. Exemplary gel electrophoresis images of PCR products preamplified with multi-gene PCR assays from single MDA-MB-231 cell and patient-derived CTC are shown.

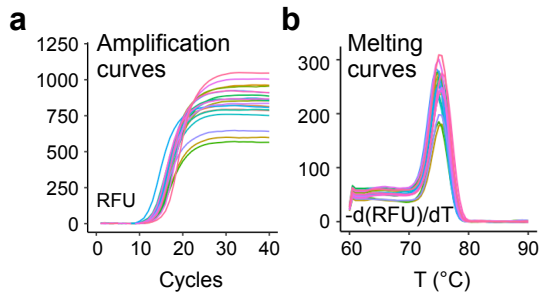

**Fig. S9.** (a) Amplification curves and (b) melting curves of amplicons obtained with CHRDL1 gene primer from 20 CTCs.

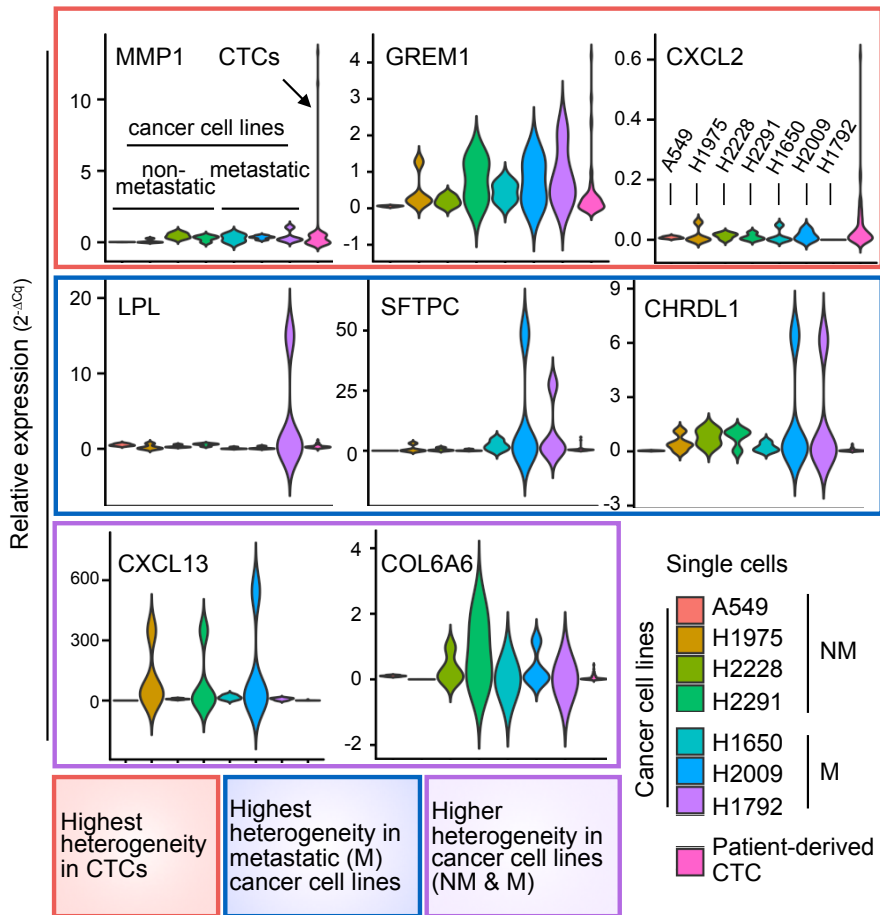

**Fig. S10.** Cell-to-cell heterogeneity in matrixome gene expression from six different lung cancer cell lines and patient-derived CTCs. GAPDH- and UBB-normalized gene expression values are shown. Single cells from metastatic (H1650, H2009, and H1792) and non-metastatic (A549, H1975, H2228 and H2291) lung cancer cell lines were cultured under the same conditions. Each experiment was performed in duplicate.



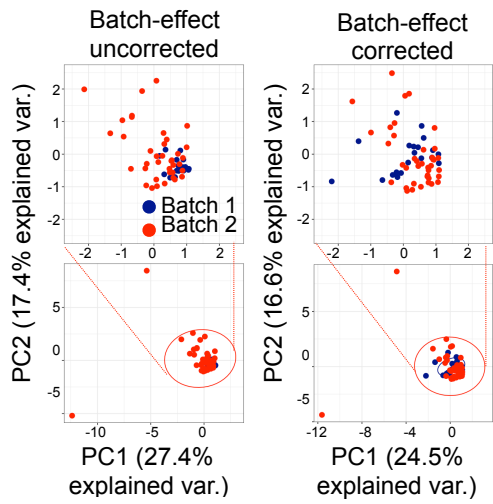

**Fig. S11.** PCA plots of targeted transcriptome data from 61 patient-derived CTCs obtained from two different laboratories demonstrating batch-effect correction.

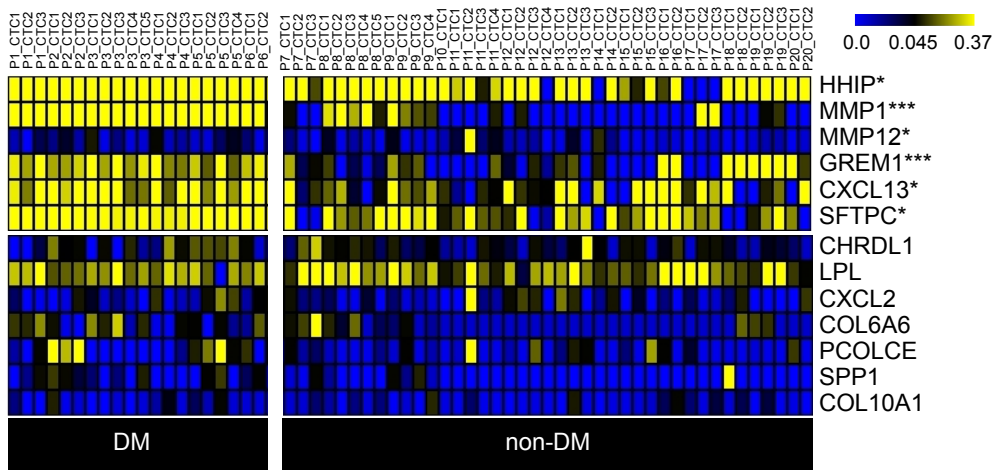

**Fig. S12.** Heatmap comparing expression profiles between DM and non-DM patient groups (\*\* $P < 0.01$ , \* $P < 0.05$ ; Wilcoxon rank sum test).

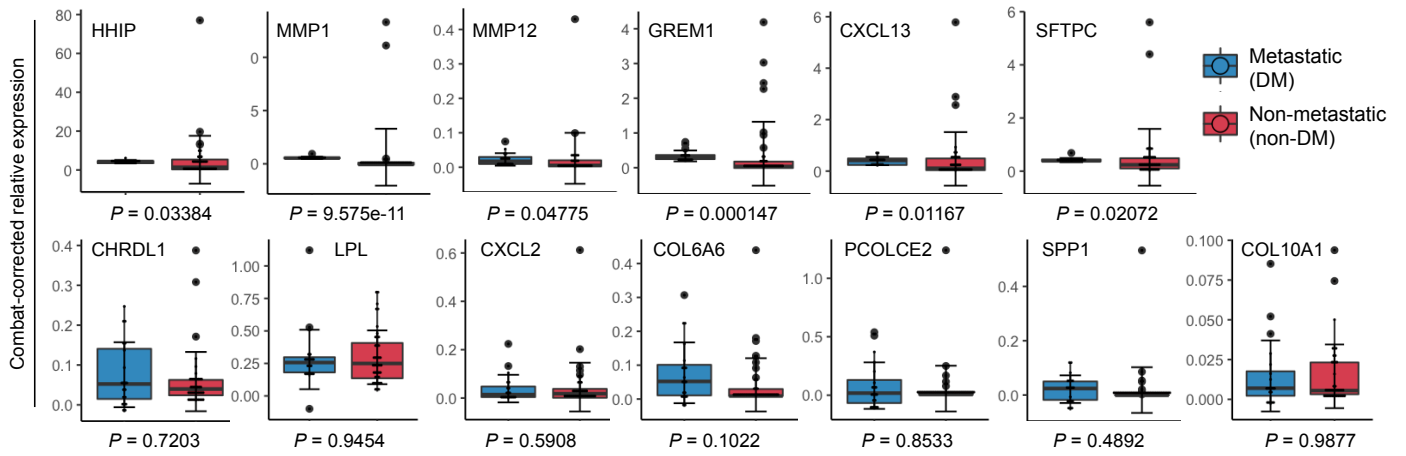

**Fig. S13.** Relative gene expression of matrisome genes in single CTCs comparing non-metastatic (non-DM) and metastatic (DM) patient group. GAPDH- and UBB-normalized gene expression values were subjected to Wilcoxon rank sum test.

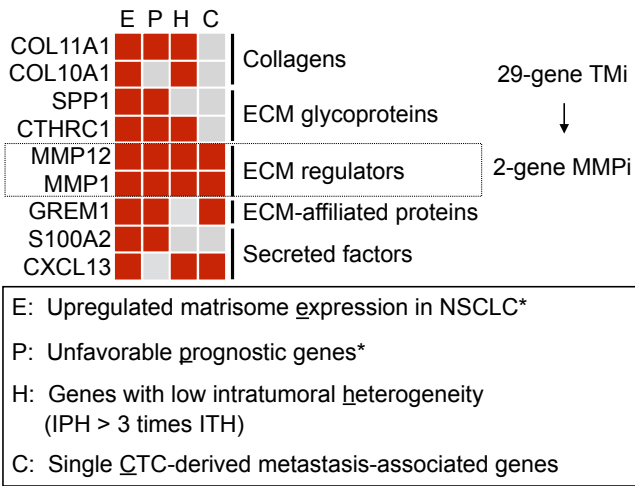

**Fig. S14.** Summary schematic of the refined prognostic gene signature tailored to the level of ITH and single-CTC-derived expression data. The asterisk denotes that data are based on our previous findings.

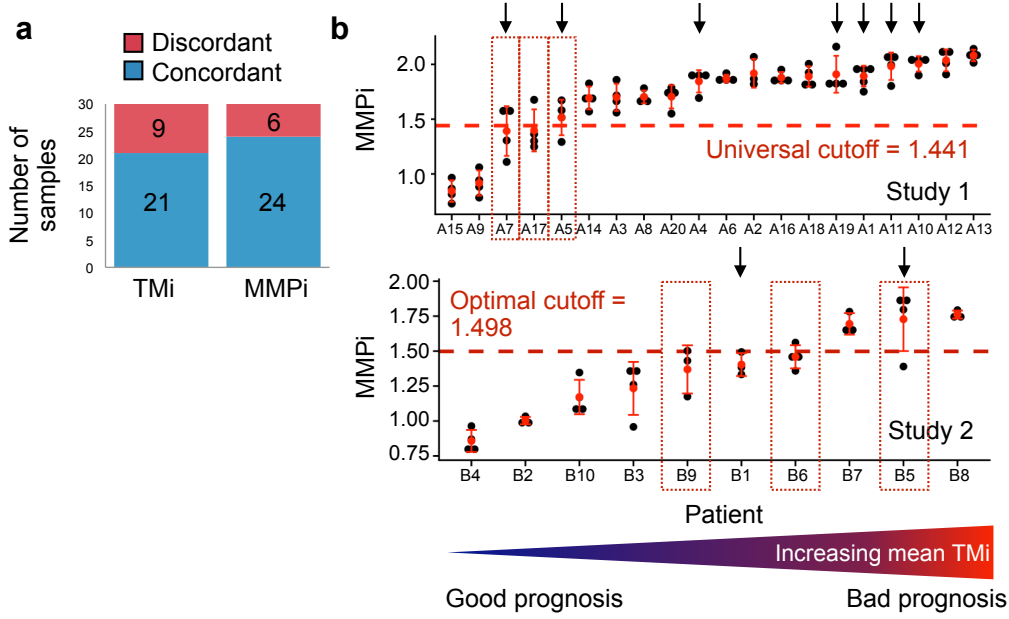

**Fig. S15.** Reduced number of discordant samples. (a) Number of ITH-driven misclassified patients in both studies. (b) MMPi distribution in spatially distinct tumor sectors. The universal cutoff value and the optimal cutoff value were used for patient stratification in Study 1 (top) and 2 (bottom), respectively. Dotted red boxes represent discordant samples having both  $MMPi_{low}$  and  $MMPi_{high}$  tumor sectors. Arrows indicate TMI-defined discordant samples. Patients are ordered by increasing mean MMPi.

### MMPi stratification

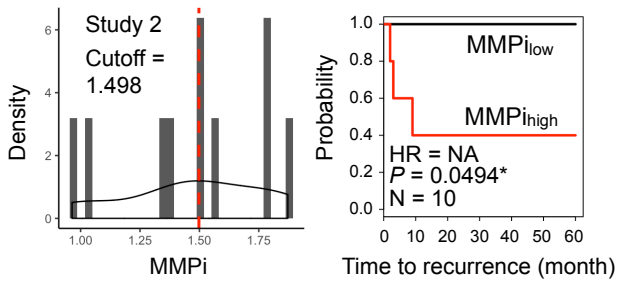

| Group                | n | Events (Recurrence) | median | 0.95 CL (lower) | 0.95 CL (upper) |
|----------------------|---|---------------------|--------|-----------------|-----------------|
| MMPi <sub>low</sub>  | 5 | 0                   | NA     | NA              | NA              |
| MMPi <sub>high</sub> | 5 | 3                   | 9      | 3               | NA              |

**Fig. S16.** Patient-level prognostic accuracy of MMPi in Study 2. Gaussian kernel density distribution (left) and Kaplan-Meier survival curves (right) are drawn. The optimal cutoff value was used for patient stratification. Hazard ratio (HR), log-rank *P*-value, and the number of patients successfully stratified (*n*) are stated. The resulting summary statistics is shown below.

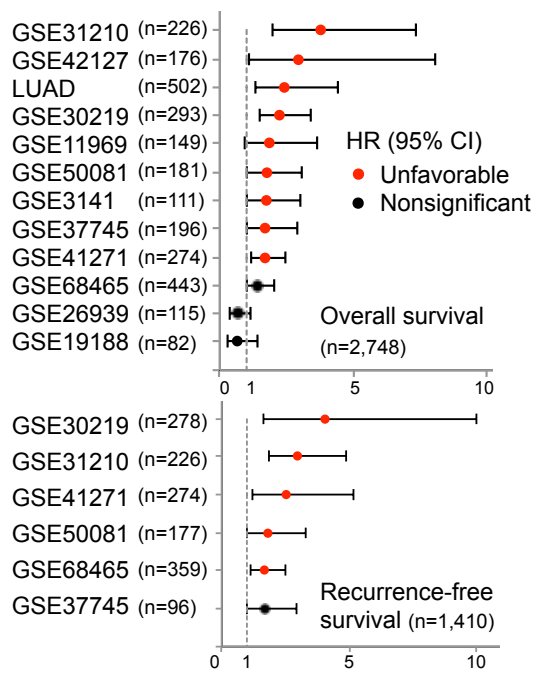

**Fig. S17.** Forest plot depicting the association between MMPi and overall survival (top) and recurrence-free survival (bottom) of lung cancer.

**MMPi stratification with universal cut-off (tumor sector-level)**

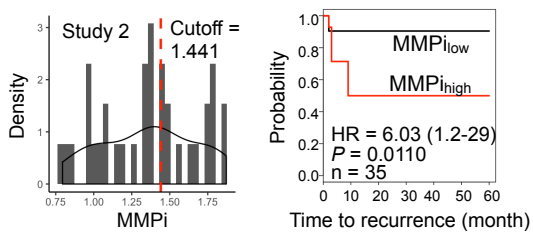

| Group                | n  | Events (Recurrence) | median | 0.95 CL (lower) | 0.95 CL (upper) |
|----------------------|----|---------------------|--------|-----------------|-----------------|
| MMPi <sub>low</sub>  | 21 | 2                   | NA     | NA              | NA              |
| MMPi <sub>high</sub> | 14 | 7                   | 9      | 9               | NA              |

**MMPi stratification with universal cut-off (patient-level)**

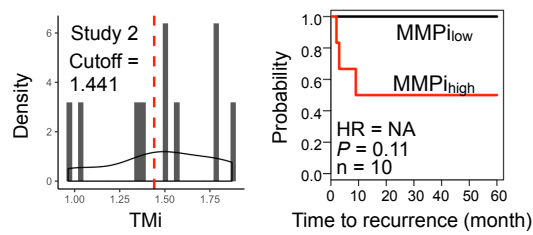

| Group                | n | Events (Recurrence) | median | 0.95 CL (lower) | 0.95 CL (upper) |
|----------------------|---|---------------------|--------|-----------------|-----------------|
| MMPi <sub>low</sub>  | 4 | 0                   | NA     | NA              | NA              |
| MMPi <sub>high</sub> | 6 | 3                   | 9      | 3               | NA              |

**Fig. S18.** Tumor sector- and patient-level prognostic accuracy of MMPi in Study 2. Predefined universal cutoff was applied for patient stratification. Gaussian kernel density distribution (left) and Kaplan-Meier survival curves (right) are drawn. The optimal cutoff value was used for patient stratification. Hazard ratio (HR), log-rank *P*-value, and the number of patients successfully stratified (*n*) are stated. The resulting summary statistics is shown below.



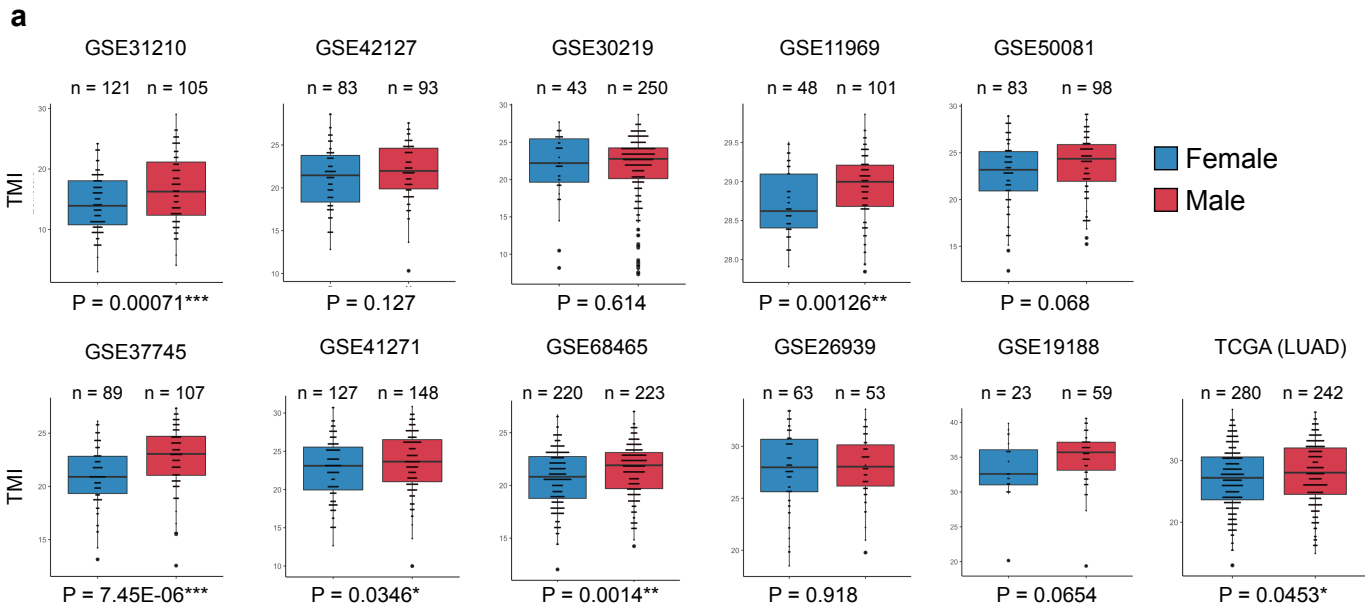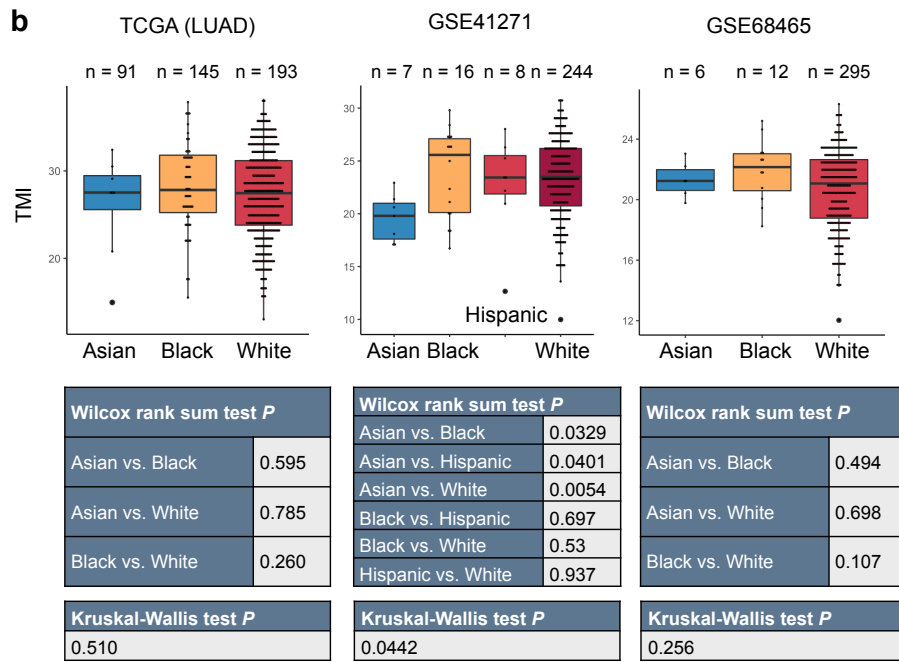

**Fig. S19.** TMI by gender and ethnicity. (a) Gender differences in TMI. The accession codes of validation datasets, number of samples (n), and Wilcoxon rank sum test P values are stated. (\*\*\*)  $P < 0.001$ , (\*\*)  $P < 0.01$ , (\*)  $P < 0.05$ ; Wilcoxon rank sum test). (b) Racial differences in TMI. The accession codes of validation datasets, number of samples (n), Wilcoxon rank sum test P values, and Kruskal-Wallis test P values are stated.

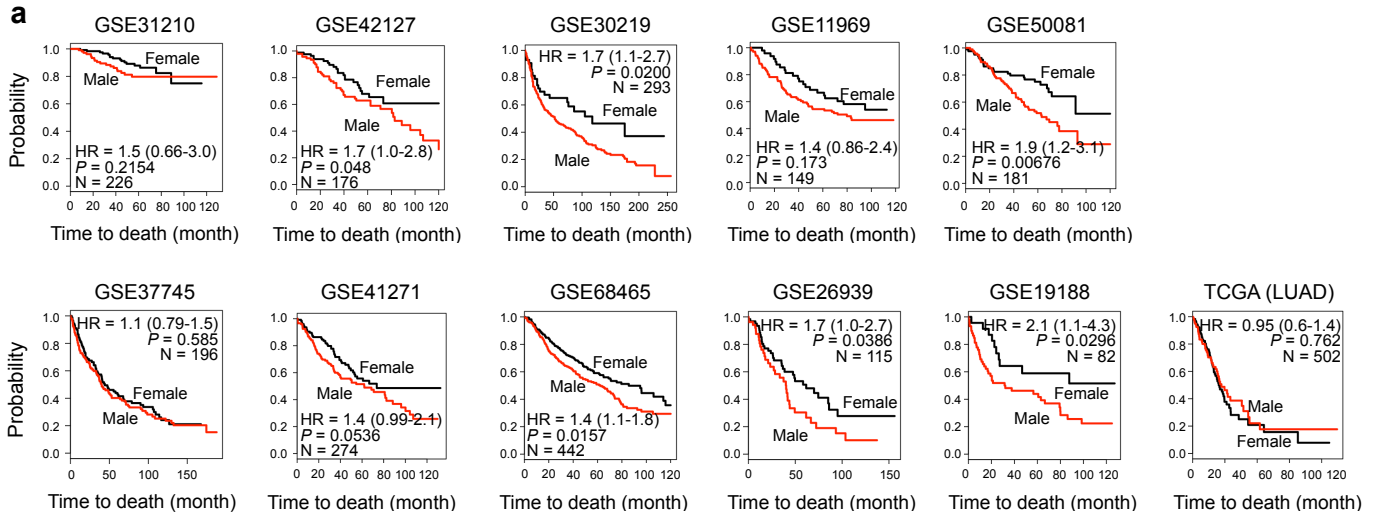

**b**

| GSE41271 | HR    | 95% Lower | 95% Upper | Log-rank P |
|----------|-------|-----------|-----------|------------|
| Asian    | 1     |           |           |            |
| Black    | 3.10  | 0.373     | 25.77     | 0.295      |
| Hispanic | 2.53  | 0.262     | 24.31     | 0.423      |
| White    | 3.11  | 0.433     | 22.26     | 0.260      |
| All      | 0.676 |           |           |            |

| GSE68465 | HR    | 95% Lower | 95% Upper | Log-rank P |
|----------|-------|-----------|-----------|------------|
| Asian    | 1     |           |           |            |
| Black    | 1.88  | 0.378     | 9.318     | 0.441      |
| White    | 2.26  | 0.559     | 9.159     | 0.252      |
| All      | 0.458 |           |           |            |

**Fig. S20.** Prognostic performance of gender and ethnicity. (a) Kaplan-Meier survival curves using previously analyzed validation datasets. Hazard ratio (HR), log-rank P-value ( $P$ ), and the number of patients successfully stratified ( $N$ ) determined from univariate Cox regression analyses are shown on each survival KM curve. Black and red KM curves represent female and male patients, respectively. (b) Estimates derived from univariate Cox regression analyses are shown.

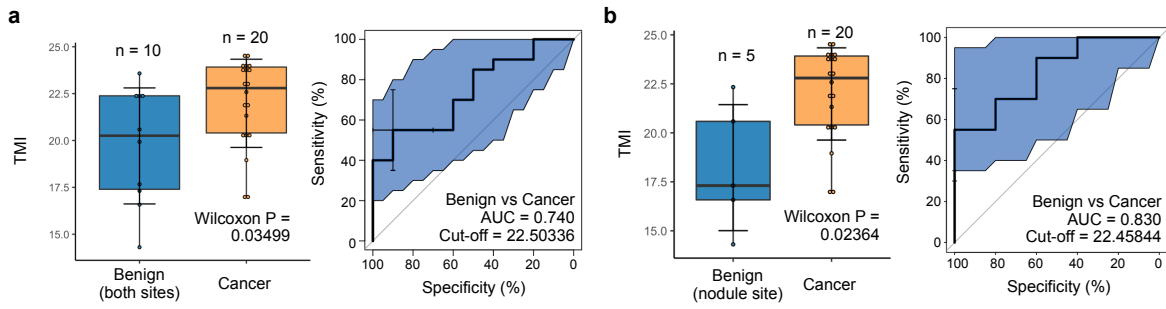

**Fig. S21.** TMI performance in distinguishing benign nodules from cancer using epithelial-lining fluid (ELF) samples, which were collected from subsegmental bronchi close to the pulmonary nodule and from the contralateral lung from patients with malignant or benign diagnosis (GSE27489). (a) Comparing TMI of benign ELF samples collected at both sites versus cancer ELF samples. *n* denotes the number of samples analyzed. No data were excluded from the analysis. (b) Comparing TMI of benign ELF samples collected at nodule site versus cancer ELF samples. The *optimal* TMI cut-off values were determined using the Cutoff Finder algorithm, as described in Methods. The receiver-operating characteristics (ROC) curves are drawn with 95% confidence intervals. Raw data was obtained and RMA-normalized using GEOquery and affy R/Bioconductor package, respectively. OGN expression data was missing in the dataset.

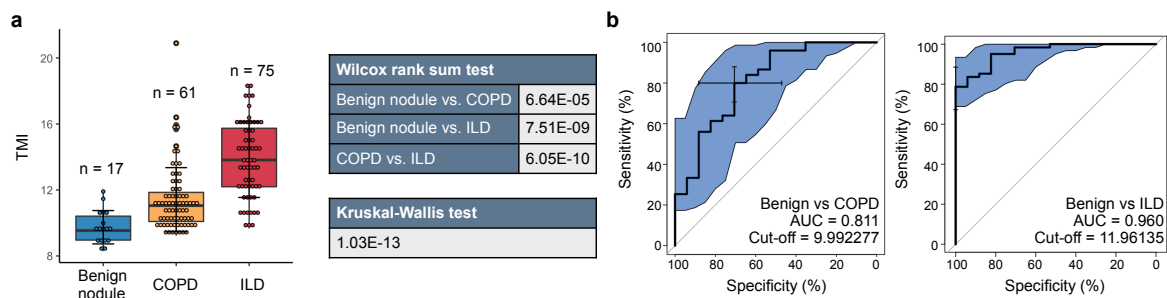

**Fig. S22.** Tmi performance in distinguishing benign nodules from other types of lung disease (e.g., chronic obstructive pulmonary disease (COPD) and interstitial lung disease (ILD)) using tissue samples (GSE47460 probed with GPL6480 profiling platform). (a) Comparing Tmi of benign nodules, COPD and ILD (left).  $n$  denotes the number of samples analyzed. No data were excluded from the analysis. Wilcoxon rank sum test and Kruskal-Wallis test  $P$ -values are stated (right). (b) ROC curves are drawn with 95% confidence intervals. The *optimal* Tmi cut-off values were determined using the Cutoff Finder algorithm, as described in Methods.

## Supplementary Tables

**Table S1.** Patient information (Study 1).

|                       | Tumor  | TMi         | MMPi        | Sex    | Age | Histology   | Stage |
|-----------------------|--------|-------------|-------------|--------|-----|-------------|-------|
| GSM835268_02_A_TK.CEL | Tumor  | 19.48971767 | 1.945513901 | Female | 44  | adeno       | 2B    |
| GSM835269_02_B_TK.CEL | Tumor  | 24.18669724 | 1.957698704 | Female | 44  | adeno       | 2B    |
| GSM835270_02_C_TK.CEL | Tumor  | 19.13931036 | 1.841950955 | Female | 44  | adeno       | 2B    |
| GSM835271_02_D_TK.CEL | Tumor  | 18.94933118 | 1.968295019 | Female | 44  | adeno       | 2B    |
| GSM835272_02_N_TK.CEL | Normal | 8.388437177 | 0.935072211 | Female | 44  | normal lung |       |
| GSM835273_07_A_TK.CEL | Tumor  | 23.90353018 | 1.751130059 | Male   | 65  | adeno       | 2B    |
| GSM835274_07_B_TK.CEL | Tumor  | 23.12958417 | 1.819835094 | Male   | 65  | adeno       | 2B    |
| GSM835275_07_C_TK.CEL | Tumor  | 24.35945625 | 1.867754678 | Male   | 65  | adeno       | 2B    |
| GSM835276_07_D_TK.CEL | Tumor  | 24.81849628 | 2.06761209  | Male   | 65  | adeno       | 2B    |
| GSM835277_07_N_TK.CEL | Normal | 9.727908671 | 0.71542968  | Male   | 65  | normal lung |       |
| GSM835278_08_A_TK.CEL | Tumor  | 23.00907989 | 1.715346185 | Female | 54  | mixed       | 1A    |
| GSM835279_08_B_TK.CEL | Tumor  | 21.04990173 | 1.560188541 | Female | 54  | mixed       | 1A    |
| GSM835280_08_C_TK.CEL | Tumor  | 24.19324283 | 1.858029441 | Female | 54  | mixed       | 1A    |
| GSM835281_08_D_TK.CEL | Tumor  | 22.09079374 | 1.664151952 | Female | 54  | mixed       | 1A    |
| GSM835282_08_N_TK.CEL | Normal | 8.370014181 | 0.846890731 | Female | 54  | normal lung |       |
| GSM835283_10_A_TK.CEL | Tumor  | 24.51049987 | 1.916142244 | Male   | 67  | mixed       | 1B    |
| GSM835284_10_B_TK.CEL | Tumor  | 20.74919063 | 1.883030269 | Male   | 67  | mixed       | 1B    |
| GSM835285_10_C_TK.CEL | Tumor  | 25.05444035 | 1.88754711  | Male   | 67  | mixed       | 1B    |
| GSM835286_10_D_TK.CEL | Tumor  | 18.3045224  | 1.693422545 | Male   | 67  | mixed       | 1B    |
| GSM835287_10_N_TK.CEL | Normal | 7.168335446 | 0.551313247 | Male   | 67  | normal lung |       |
| GSM835288_11_A_TK.CEL | Tumor  | 24.52852228 | 1.580925016 | Male   | 65  | mixed       | 1A    |
| GSM835289_11_B_TK.CEL | Tumor  | 23.07041406 | 1.671643351 | Male   | 65  | mixed       | 1A    |
| GSM835290_11_C_TK.CEL | Tumor  | 23.78853085 | 1.515724485 | Male   | 65  | mixed       | 1A    |
| GSM835291_11_D_TK.CEL | Tumor  | 16.98162218 | 1.292276889 | Male   | 65  | mixed       | 1A    |
| GSM835292_11_N_TK.CEL | Normal | 8.821429566 | 1.163021843 | Male   | 65  | normal lung |       |
| GSM835293_17_A_TK.CEL | Tumor  | 25.88265615 | 1.918466354 | Male   | 54  | adeno       | 2B    |
| GSM835294_17_B_TK.CEL | Tumor  | 25.08586988 | 1.843655982 | Male   | 54  | adeno       | 2B    |
| GSM835295_17_C_TK.CEL | Tumor  | 23.29688615 | 1.873410102 | Male   | 54  | adeno       | 2B    |
| GSM835296_17_D_TK.CEL | Tumor  | 24.6069508  | 1.844512128 | Male   | 54  | adeno       | 2B    |
| GSM835297_17_N_TK.CEL | Normal | 8.64513943  | 0.836985511 | Male   | 54  | normal lung |       |
| GSM835298_22_A_TK.CEL | Tumor  | 23.67359443 | 1.581452547 | Male   | 59  | adeno       | 2A    |
| GSM835299_22_B_TK.CEL | Tumor  | 20.87986188 | 1.569179445 | Male   | 59  | adeno       | 2A    |
| GSM835300_22_C_TK.CEL | Tumor  | 17.72216439 | 1.110041052 | Male   | 59  | adeno       | 2A    |
| GSM835301_22_D_TK.CEL | Tumor  | 21.69870499 | 1.30578094  | Male   | 59  | adeno       | 2A    |
| GSM835302_22_N_TK.CEL | Normal | 8.787120919 | 0.767217609 | Male   | 59  | normal lung |       |
| GSM835303_27_A_TK.CEL | Tumor  | 24.51309961 | 1.685494245 | Female | 65  | adeno       | 1B    |
| GSM835304_27_B_TK.CEL | Tumor  | 24.70293796 | 1.701697784 | Female | 65  | adeno       | 1B    |
| GSM835305_27_C_TK.CEL | Tumor  | 25.20381171 | 1.78177728  | Female | 65  | adeno       | 1B    |
| GSM835306_27_D_TK.CEL | Tumor  | 25.06414792 | 1.642298613 | Female | 65  | adeno       | 1B    |
| GSM835307_27_N_TK.CEL | Normal | 9.421325576 | 0.850582851 | Female | 65  | normal lung |       |
| GSM835308_28_A_TK.CEL | Tumor  | 14.24464125 | 0.942084702 | Male   | 61  | adeno       | 1B    |
| GSM835309_28_B_TK.CEL | Tumor  | 15.7745397  | 0.784777257 | Male   | 61  | adeno       | 1B    |
| GSM835310_28_C_TK.CEL | Tumor  | 14.23122417 | 0.882796497 | Male   | 61  | adeno       | 1B    |
| GSM835311_28_D_TK.CEL | Tumor  | 17.18289346 | 1.059977972 | Male   | 61  | adeno       | 1B    |
| GSM835312_28_N_TK.CEL | Normal | 6.659556999 | 0.559125972 | Male   | 61  | normal lung |       |
| GSM835313_34_A_TK.CEL | Tumor  | 24.20591447 | 2.036795337 | Male   | 58  | squamous    | 1B    |
| GSM835314_34_B_TK.CEL | Tumor  | 18.19810956 | 1.899685549 | Male   | 58  | squamous    | 1B    |
| GSM835315_34_C_TK.CEL | Tumor  | 27.19756689 | 2.038919048 | Male   | 58  | squamous    | 1B    |
| GSM835316_34_D_TK.CEL | Tumor  | 26.76463645 | 2.044136094 | Male   | 58  | squamous    | 1B    |
| GSM835317_34_N_TK.CEL | Normal | 8.441697328 | 0.719920682 | Male   | 58  | normal lung |       |
| GSM835318_41_A_TK.CEL | Tumor  | 21.62777216 | 1.994425954 | Male   | 65  | adeno       | 1B    |
| GSM835319_41_B_TK.CEL | Tumor  | 22.57742987 | 2.086207261 | Male   | 65  | adeno       | 1B    |

|                       |        |             |             |        |    |             |    |
|-----------------------|--------|-------------|-------------|--------|----|-------------|----|
| GSM835320_41_C_TK.CEL | Tumor  | 23.80694814 | 2.045588247 | Male   | 65 | adeno       | 1B |
| GSM835321_41_D_TK.CEL | Tumor  | 18.75460022 | 1.80296284  | Male   | 65 | adeno       | 1B |
| GSM835322_41_N_TK.CEL | Normal | 7.806526006 | 0.819809632 | Male   | 65 | normal lung |    |
| GSM835323_42_A_TK.CEL | Tumor  | 25.25557138 | 2.099046083 | Male   | 62 | squamous    | 1A |
| GSM835324_42_B_TK.CEL | Tumor  | 21.31813957 | 1.908175782 | Male   | 62 | squamous    | 1A |
| GSM835325_42_C_TK.CEL | Tumor  | 25.93059288 | 2.127901742 | Male   | 62 | squamous    | 1A |
| GSM835326_42_D_TK.CEL | Tumor  | 23.45166617 | 2.011141128 | Male   | 62 | squamous    | 1A |
| GSM835327_42_N_TK.CEL | Normal | 6.71881133  | 0.529976911 | Male   | 62 | normal lung |    |
| GSM835328_43_A_TK.CEL | Tumor  | 25.69601914 | 2.01497391  | Male   | 61 | mixed       | 1B |
| GSM835329_43_B_TK.CEL | Tumor  | 26.08874519 | 2.094855663 | Male   | 61 | mixed       | 1B |
| GSM835330_43_C_TK.CEL | Tumor  | 26.52775797 | 2.141321668 | Male   | 61 | mixed       | 1B |
| GSM835331_43_D_TK.CEL | Tumor  | 26.47414148 | 2.07300947  | Male   | 61 | mixed       | 1B |
| GSM835332_43_N_TK.CEL | Normal | 12.31222553 | 1.366163649 | Male   | 61 | normal lung |    |
| GSM835333_57_A_TK.CEL | Tumor  | 24.45139248 | 1.570066983 | Male   | 69 | adeno       | 1B |
| GSM835334_57_B_TK.CEL | Tumor  | 24.18599349 | 1.689656086 | Male   | 69 | adeno       | 1B |
| GSM835335_57_C_TK.CEL | Tumor  | 23.87251052 | 1.688045144 | Male   | 69 | adeno       | 1B |
| GSM835336_57_D_TK.CEL | Tumor  | 24.51992115 | 1.825527728 | Male   | 69 | adeno       | 1B |
| GSM835337_57_N_TK.CEL | Normal | 6.554569172 | 0.581857174 | Male   | 69 | normal lung |    |
| GSM835338_58_A_TK.CEL | Tumor  | 17.76759386 | 0.965247838 | Female | 38 | adeno       | 1A |
| GSM835339_58_B_TK.CEL | Tumor  | 16.61872984 | 0.729615195 | Female | 38 | adeno       | 1A |
| GSM835340_58_C_TK.CEL | Tumor  | 18.97458533 | 0.866156109 | Female | 38 | adeno       | 1A |
| GSM835341_58_D_TK.CEL | Tumor  | 15.994222   | 0.815564553 | Female | 38 | adeno       | 1A |
| GSM835342_58_N_TK.CEL | Normal | 6.879915607 | 0.520434022 | Female | 38 | normal lung |    |
| GSM835343_59_A_TK.CEL | Tumor  | 20.84738228 | 1.874087724 | Male   | 65 | mixed       | 1B |
| GSM835344_59_B_TK.CEL | Tumor  | 23.45503325 | 1.950814725 | Male   | 65 | mixed       | 1B |
| GSM835345_59_C_TK.CEL | Tumor  | 24.50455309 | 1.831926545 | Male   | 65 | mixed       | 1B |
| GSM835346_59_D_TK.CEL | Tumor  | 23.68791919 | 1.861657643 | Male   | 65 | mixed       | 1B |
| GSM835347_59_N_TK.CEL | Normal | 8.436073128 | 0.821111901 | Male   | 65 | normal lung |    |
| GSM835348_62_A_TK.CEL | Tumor  | 18.23210735 | 1.676468481 | Male   | 65 | adeno       | 1B |
| GSM835349_62_B_TK.CEL | Tumor  | 14.96083824 | 1.300061003 | Male   | 65 | adeno       | 1B |
| GSM835350_62_C_TK.CEL | Tumor  | 16.5382644  | 1.248981281 | Male   | 65 | adeno       | 1B |
| GSM835351_62_D_TK.CEL | Tumor  | 18.55073652 | 1.363625909 | Male   | 65 | adeno       | 1B |
| GSM835352_62_N_TK.CEL | Normal | 7.525615701 | 0.76230851  | Male   | 65 | normal lung |    |
| GSM835353_85_A_TK.CEL | Tumor  | 25.16421012 | 1.923851162 | Male   | 62 | squamous    | 2B |
| GSM835354_85_B_TK.CEL | Tumor  | 23.57052677 | 1.800175571 | Male   | 62 | squamous    | 2B |
| GSM835355_85_C_TK.CEL | Tumor  | 24.81184367 | 1.830494442 | Male   | 62 | squamous    | 2B |
| GSM835356_85_D_TK.CEL | Tumor  | 26.16514466 | 2.004432342 | Male   | 62 | squamous    | 2B |
| GSM835357_85_N_TK.CEL | Normal | 7.520300682 | 0.976481958 | Male   | 62 | normal lung |    |
| GSM835358_93_A_TK.CEL | Tumor  | 22.24508544 | 1.8036776   | Male   | 64 | squamous    | 2B |
| GSM835359_93_B_TK.CEL | Tumor  | 20.49354309 | 1.829528038 | Male   | 64 | squamous    | 2B |
| GSM835360_93_C_TK.CEL | Tumor  | 22.84187389 | 1.844231482 | Male   | 64 | squamous    | 2B |
| GSM835361_93_D_TK.CEL | Tumor  | 26.48924072 | 2.161256938 | Male   | 64 | squamous    | 2B |
| GSM835362_93_N_TK.CEL | Normal | 8.358020853 | 0.962153834 | Male   | 64 | normal lung |    |
| GSM835363_98_A_TK.CEL | Tumor  | 23.95144029 | 1.717244658 | Male   | 69 | mixed       | 1B |
| GSM835364_98_B_TK.CEL | Tumor  | 22.40547004 | 1.787165347 | Male   | 69 | mixed       | 1B |
| GSM835365_98_C_TK.CEL | Tumor  | 23.32451814 | 1.763652674 | Male   | 69 | mixed       | 1B |
| GSM835366_98_D_TK.CEL | Tumor  | 24.33820635 | 1.5505964   | Male   | 69 | mixed       | 1B |
| GSM835367_98_N_TK.CEL | Normal | 7.86715623  | 0.786301705 | Male   | 69 | normal lung |    |

**Table S2.** Patient information (Study 2). ADC=Adenocarcinoma; SCC=Squamous cell carcinoma; LCC=Large-cell carcinoma; PC=Pleomorphic carcinoma; RFS=recurrence-free survival.

| Patient | MMPi      | TMi             | RFS                        | RFS_time              | OS     | Age    | Sex    | Ethnicity   | Smoking   |
|---------|-----------|-----------------|----------------------------|-----------------------|--------|--------|--------|-------------|-----------|
| Pa1.R1  | 1.333     | 22.351          | 0                          | 60                    | 63     | 59     | 2_M    | 1_Asian     | 1_Never   |
| Pa1.R2  | 1.384     | 22.783          | 0                          | 60                    | 63     | 59     | 2_M    | 1_Asian     | 1_Never   |
| Pa1.R3  | 1.494     | 23.164          | 0                          | 60                    | 63     | 59     | 2_M    | 1_Asian     | 1_Never   |
| Pa2.R1  | 0.984     | 16.629          | 0                          | 60                    | 62     | 62     | 1_F    | 2_Black     | 1_Never   |
| Pa2.R2  | 0.992     | 18.717          | 0                          | 60                    | 62     | 62     | 1_F    | 2_Black     | 1_Never   |
| Pa2.R3  | 1.033     | 17.139          | 0                          | 60                    | 62     | 62     | 1_F    | 2_Black     | 1_Never   |
| Pa3.R1  | 1.344     | 20.092          | 0                          | 52                    | 53     | 63     | 2_M    | 2_Black     | 2_Current |
| Pa3.R2  | 0.958     | 15.809          | 0                          | 52                    | 53     | 63     | 2_M    | 2_Black     | 2_Current |
| Pa3.R3  | 1.261     | 19.310          | 0                          | 52                    | 53     | 63     | 2_M    | 2_Black     | 2_Current |
| Pa3.R4  | 1.371     | 22.261          | 0                          | 52                    | 53     | 63     | 2_M    | 2_Black     | 2_Current |
| Pa4.R1  | 0.870     | 20.587          | 0                          | 60                    | 60     | 70     | 2_M    | 3_Caucasian | 3_Former  |
| Pa4.R2  | 0.964     | 21.169          | 0                          | 60                    | 60     | 70     | 2_M    | 3_Caucasian | 3_Former  |
| Pa4.R3  | 0.794     | 20.936          | 0                          | 60                    | 60     | 70     | 2_M    | 3_Caucasian | 3_Former  |
| Pa4.R4  | 0.802     | 20.339          | 0                          | 60                    | 60     | 70     | 2_M    | 3_Caucasian | 3_Former  |
| Pa5.R1  | 1.390     | 18.411          | 0                          | 60                    | 62     | 47     | 2_M    | 3_Caucasian | 3_Former  |
| Pa5.R2  | 1.872     | 22.887          | 0                          | 60                    | 62     | 47     | 2_M    | 3_Caucasian | 3_Former  |
| Pa5.R3  | 1.797     | 22.646          | 0                          | 60                    | 62     | 47     | 2_M    | 3_Caucasian | 3_Former  |
| Pa5.R4  | 1.854     | 22.471          | 0                          | 60                    | 62     | 47     | 2_M    | 3_Caucasian | 3_Former  |
| Pa6.R1  | 1.359     | 20.606          | 0                          | 36                    |        | 73     | 1_F    | 3_Caucasian | 2_Current |
| Pa6.R2  | 1.462     | 20.863          | 0                          | 36                    |        | 73     | 1_F    | 3_Caucasian | 2_Current |
| Pa6.R3  | 1.561     | 21.196          | 0                          | 36                    |        | 73     | 1_F    | 3_Caucasian | 2_Current |
| Pa6.R4  | 1.455     | 21.954          | 0                          | 36                    |        | 73     | 1_F    | 3_Caucasian | 2_Current |
| Pa7.R1  | 1.782     | 22.898          | 1                          | 9                     | 12     | 64     | 1_F    | 3_Caucasian | 3_Former  |
| Pa7.R2  | 1.639     | 23.439          | 1                          | 9                     | 12     | 64     | 1_F    | 3_Caucasian | 3_Former  |
| Pa7.R3  | 1.663     | 23.064          | 1                          | 9                     | 12     | 64     | 1_F    | 3_Caucasian | 3_Former  |
| Pa8.R1  | 1.739     | 23.754          | 1                          | 3                     | 4      | 53     | 2_M    | 3_Caucasian | 2_Current |
| Pa8.R2  | 1.793     | 23.605          | 1                          | 3                     | 4      | 53     | 2_M    | 3_Caucasian | 2_Current |
| Pa8.R3  | 1.752     | 23.716          | 1                          | 3                     | 4      | 53     | 2_M    | 3_Caucasian | 2_Current |
| Pa9.R1  | 1.174     | 20.104          | 1                          | 2                     | 7      | 47     | 1_F    | 3_Caucasian | 2_Current |
| Pa9.R2  | 1.431     | 21.364          | 1                          | 2                     | 7      | 47     | 1_F    | 3_Caucasian | 2_Current |
| Pa9.R3  | 1.502     | 20.750          | 1                          | 2                     | 7      | 47     | 1_F    | 3_Caucasian | 2_Current |
| Pa10.R1 | 1.168     | 21.534          | 0                          | 55                    | 57     | 60     | 1_F    | 3_Caucasian | 2_Current |
| Pa10.R2 | 1.347     | 21.682          | 0                          | 55                    | 57     | 60     | 1_F    | 3_Caucasian | 2_Current |
| Pa10.R3 | 1.085     | 21.331          | 0                          | 55                    | 57     | 60     | 1_F    | 3_Caucasian | 2_Current |
| Pa10.R4 | 1.086     | 22.068          | 0                          | 55                    | 57     | 60     | 1_F    | 3_Caucasian | 2_Current |
| Patient | Histology | Tumor Size (cm) | Plural Invasion (+Y or -N) | Lymph Node (+Y or -N) | Path T | Path N | Path M | Final Path  | Stage     |
| Pa1.R1  | ADC       | 7.2; 0.15       | N                          | N                     | T3     | N0     | M0     | IIB         | II        |
| Pa1.R2  | ADC       | 7.2; 0.15       | N                          | N                     | T3     | N0     | M0     | IIB         | II        |
| Pa1.R3  | ADC       | 7.2; 0.15       | N                          | N                     | T3     | N0     | M0     | IIB         | II        |
| Pa2.R1  | ADC       | 2x1.8x1.5       | N                          | N                     | T2a    | N0     | M0     | IB          | I         |
| Pa2.R2  | ADC       | 2x1.8x1.5       | N                          | N                     | T2a    | N0     | M0     | IB          | I         |
| Pa2.R3  | ADC       | 2x1.8x1.5       | N                          | N                     | T2a    | N0     | M0     | IB          | I         |
| Pa3.R1  | ADC       | 2.5 ; 1.2       | Y                          | N                     | T3     | N0     | M0     | IIB         | II        |
| Pa3.R2  | ADC       | 2.5 ; 1.2       | Y                          | N                     | T3     | N0     | M0     | IIB         | II        |
| Pa3.R3  | ADC       | 2.5 ; 1.2       | Y                          | N                     | T3     | N0     | M0     | IIB         | II        |
| Pa3.R4  | ADC       | 2.5 ; 1.2       | Y                          | N                     | T3     | N0     | M0     | IIB         | II        |
| Pa4.R1  | ADC       | 4.400           | Y                          | Y                     | T2b    | N1     | M0     | IIB         | II        |
| Pa4.R2  | ADC       | 4.400           | Y                          | Y                     | T2b    | N1     | M0     | IIB         | II        |
| Pa4.R3  | ADC       | 4.400           | Y                          | Y                     | T2b    | N1     | M0     | IIB         | II        |
| Pa4.R4  | ADC       | 4.400           | Y                          | Y                     | T2b    | N1     | M0     | IIB         | II        |
| Pa5.R1  | ADC       | 4.000           | Y                          | N                     | T2a    | N0     | M0     | NA          | NA        |
| Pa5.R2  | ADC       | 4.000           | Y                          | N                     | T2a    | N0     | M0     | NA          | NA        |
| Pa5.R3  | ADC       | 4.000           | Y                          | N                     | T2a    | N0     | M0     | NA          | NA        |

|         |     |                 |   |   |     |    |    |      |     |
|---------|-----|-----------------|---|---|-----|----|----|------|-----|
| Pa5.R4  | ADC | 4.000           | Y | N | T2a | N0 | M0 | NA   | NA  |
| Pa6.R1  | ADC | 2.500           | N | Y | T1b | N1 | M0 | NA   | NA  |
| Pa6.R2  | ADC | 2.500           | N | Y | T1b | N1 | M0 | NA   | NA  |
| Pa6.R3  | ADC | 2.500           | N | Y | T1b | N1 | M0 | NA   | NA  |
| Pa6.R4  | ADC | 2.500           | N | Y | T1b | N1 | M0 | NA   | NA  |
| Pa7.R1  | SCC | 2.000           | N | N | T1a | N0 | M0 | IA   | I   |
| Pa7.R2  | SCC | 2.000           | N | N | T1a | N0 | M0 | IA   | I   |
| Pa7.R3  | SCC | 2.000           | N | N | T1a | N0 | M0 | IA   | I   |
| Pa8.R1  | SCC | 5.5 X 5.5 X 5.0 | Y | N | T2b | N0 | M0 | NA   | NA  |
| Pa8.R2  | SCC | 5.5 X 5.5 X 5.0 | Y | N | T2b | N0 | M0 | NA   | NA  |
| Pa8.R3  | SCC | 5.5 X 5.5 X 5.0 | Y | N | T2b | N0 | M0 | NA   | NA  |
| Pa9.R1  | LCC | 6.500           | Y | Y | T2b | N2 | M0 | IIIA | III |
| Pa9.R2  | LCC | 6.500           | Y | Y | T2b | N2 | M0 | IIIA | III |
| Pa9.R3  | LCC | 6.500           | Y | Y | T2b | N2 | M0 | IIIA | III |
| Pa10.R1 | PC  | 5.000           | N | Y | T2a | N1 | NA | NA   | NA  |
| Pa10.R2 | PC  | 5.000           | N | Y | T2a | N1 | NA | NA   | NA  |
| Pa10.R3 | PC  | 5.000           | N | Y | T2a | N1 | NA | NA   | NA  |
| Pa10.R4 | PC  | 5.000           | N | Y | T2a | N1 | NA | NA   | NA  |



**Table S3.** ITH and IPH of each matrisome gene. ITH=Intra-tumor heterogeneity; IPH=Inter-patient heterogeneity.

| Gene    | Study 1     |             | Study 2     |             |
|---------|-------------|-------------|-------------|-------------|
|         | ITH         | IPH         | ITH         | IPH         |
| FCN3    | 0.796538301 | 0.203461699 | 0.761243739 | 0.238756261 |
| ADAMTS8 | 0.671307954 | 0.328692046 | 0.690965167 | 0.309034833 |
| CD36    | 0.640306122 | 0.359693878 | 0.487628442 | 0.512371558 |
| SFTPD   | 0.608910173 | 0.391089827 | 0.447855874 | 0.552144126 |
| COL6A6  | 0.604475942 | 0.395524058 | 0.570692099 | 0.429307901 |
| IL6     | 0.557276679 | 0.442723321 | 0.207899716 | 0.792100284 |
| WIF1    | 0.540786536 | 0.459213464 | 0.19857888  | 0.80142112  |
| CPB2    | 0.474528442 | 0.525471558 | 0.710846954 | 0.289153046 |
| SPP1    | 0.442066269 | 0.557933731 | 0.395235656 | 0.604764344 |
| CHRD1   | 0.434849653 | 0.565150347 | 0.414153763 | 0.585846237 |
| CXCL2   | 0.34894564  | 0.65105436  | 0.346606335 | 0.653393665 |
| COL10A1 | 0.337178989 | 0.662821011 | 0.339730429 | 0.660269571 |
| TNNC1   | 0.33030078  | 0.66969922  | 0.215587393 | 0.784412607 |
| SFTPC   | 0.290379747 | 0.709620253 | 0.27408     | 0.72592     |
| SFTPA2  | 0.290379747 | 0.709620253 | 0.152589467 | 0.847410533 |
| GREM1   | 0.256309362 | 0.743690638 | 0.252070741 | 0.747929259 |
| ABI3BP  | 0.25399081  | 0.74600919  | 0.511661631 | 0.488338369 |
| CXCL13  | 0.247111606 | 0.752888394 | 0.294946293 | 0.705053707 |
| COL11A1 | 0.243488901 | 0.756511099 | 0.301611171 | 0.698388829 |
| HHIP    | 0.219792639 | 0.780207361 | 0.775099639 | 0.224900361 |
| OGN     | 0.217694732 | 0.782305268 | 0.843301286 | 0.156698714 |
| MMP1    | 0.192482046 | 0.807517954 | 0.107362382 | 0.892637618 |
| CTHRC1  | 0.190945601 | 0.809054399 | 0.198772383 | 0.801227617 |
| MAMDC2  | 0.183685893 | 0.816314107 | 0.330655667 | 0.669344333 |
| S100A12 | 0.169620253 | 0.830379747 | 0.220413805 | 0.779586195 |
| PCOLCE2 | 0.165827036 | 0.834172964 | 0.41018351  | 0.58981649  |
| MMP12   | 0.138695039 | 0.861304961 | 0.23283474  | 0.76716526  |
| LPL     | 0.116966725 | 0.883033275 | 0.639720714 | 0.360279286 |
| S100A2  | 0.033770015 | 0.966229985 | 0.056392523 | 0.943607477 |

**Table S4.** Patient information (liquid biopsies). Pt=Patient; Hist=Histology; ADC=Adenocarcinoma; NT=Neuroendocrine tumor (LCNEC/carcinoid); NS=Never-smoker; ES=Ex-smoker; CS=Current smoker

| Pt | CTC counts | Group CTC | RFS | RFS_time | pT  | pN | pM | Gender | Age | Hist | Stage | OS | OS_time | Smoking |
|----|------------|-----------|-----|----------|-----|----|----|--------|-----|------|-------|----|---------|---------|
| 1  | 3          | G1        | NA  | NA       | NA  | NA | NA | NA     | NA  | NA   | NA    | NA | NA      | NA      |
| 2  | 3          | G1        | NA  | NA       | NA  | NA | NA | Female | 38  | ADC  | 1     | 0  | 0       | NA      |
| 3  | 5          | G2        | 0   | NA       | NA  | NA | NA | Female | 56  | ADC  | 4     | 0  | 15.6    | NA      |
| 4  | 3          | G1        | 0   | NA       | NA  | NA | NA | Male   | 72  | ADC  | 4     | 0  | 15.9    | NA      |
| 5  | 4          | G2        | 0   | NA       | NA  | NA | NA | Male   | 56  | ADC  | 3     | 0  | 14.7    | NA      |
| 6  | 2          | G1        | 1   | NA       | NA  | NA | NA | Male   | 64  | ADC  | 4     | 1  | 6.3     | NA      |
| 7  | 3          | G1        | 0   | 0        | T4  | N2 | M0 | Male   | 55  | ADC  | 3     | 0  | 48.2    | NS      |
| 8  | 5          | G2        | 0   | 0        | T1a | N0 | M0 | Male   | 71  | ADC  | 1     | 0  | 22.6    | ES      |
| 9  | 4          | G2        | 0   | 0        | T1b | N2 | M0 | Male   | 46  | ADC  | 3     | 0  | 14.3    | ES      |
| 10 | 1          | G1        | 0   | 0        | T1b | N0 | M0 | Female | 60  | ADC  | 1     | 0  | 48.4    | NS      |
| 11 | 4          | G2        | 0   | 0        | T2a | N0 | M0 | Female | 58  | ADC  | 1     | 0  | 50.5    | NS      |
| 12 | 4          | G2        | 0   | 0        | T1a | N0 | M0 | Female | 56  | ADC  | 1     | 0  | 28.3    | CS      |
| 13 | 3          | G1        | 0   | 0        | T1a | N0 | M0 | Female | 31  | NT   | 1     | 0  | 5.6     | CS      |
| 14 | 2          | G1        | 1   | 9.1      | T1b | N2 | M0 | Female | 69  | ADC  | 3     | 0  | 23.7    | ES      |
| 15 | 3          | G1        | NA  | 0        | T1b | N3 | M0 | Male   | 57  | ADC  | 3     | 0  | 55.1    | CS      |
| 16 | 2          | G1        | 0   | 0        | T1a | N0 | M0 | Male   | 62  | ADC  | 1     | 0  | 14.7    | ES      |
| 17 | 3          | G1        | 1   | 25       | T1a | N0 | M0 | Male   | 55  | ADC  | 1     | 0  | 32.9    | CS      |
| 18 | 2          | G1        | 0   | 0        | T2a | N1 | M0 | Female | 70  | ADC  | 2     | 0  | 14.1    | NS      |
| 19 | 3          | G1        | 0   | 0        | T1b | N0 | M0 | Male   | 65  | ADC  | 1     | 0  | 31.8    | NS      |
| 20 | 2          | G1        | 0   | 0        | T1b | N1 | M0 | Male   | 67  | ADC  | 2     | 0  | 37.1    | ES      |

**Table S5.** 32-gene assay.

| Gene    | Forward                    | Reverse                 | Bp  |
|---------|----------------------------|-------------------------|-----|
| ABI3BP  | TTGCCAAGTCACTGTCCCAAT      | GTGGCTGGACAGATTTGAAAAAT | 95  |
| ACTB    | GGCACCCAGCACAATGAAG        | GCCGATCCACACGGAGTACT    | 70  |
| ADAMTS8 | AACAAAAGCTGCTCCGTGAT       | TCTGGTTCAGGTGGACGAAC    | 175 |
| CD36    | TGGGAAAGTCACTGCGACAT       | TGCAATACCTGGCTTTTCTCA   | 80  |
| CHRD1   | TGCGAGTACAATGGGACAAC       | GTTGCCGATTCTGAAAGAGC    | 73  |
| COL10A1 | CAGGCAACAGCATTATGACC       | CATTTGACTCGGCATTGG      | 251 |
| COL11A1 | TCGCATTGACCTTCCTCTTC       | TCCCGTTGTTTTGATATTC     | 113 |
| COL6A6  | CATCGGTGCTGCACTCAG         | CTGTGGTACAGATGTTGCG     | 302 |
| CPB2    | GATATGCTTACAAAAATCCACATTGG | GCATTTTTGGCTGCTTGTCT    | 95  |
| CTHRC1  | TTGTTTCAGTGGCTCACTTCG      | TTCAATGGGAAGAGGTCCTG    | 102 |
| CXCL13  | GAGGCAGATGGAACCTTGAGC      | CTGGGGATCTTCGAATGCTA    | 158 |
| CXCL2   | AAACCCAAGTTAGTTCAATCCTG    | TCTTGGATTCTCAGCCTCTAT   | 140 |
| FCN3    | GTGAGCCAGGAGATCCAGTG       | GGGCGAAAGTACGGTTACCA    | 357 |
| GAPDH   | CAAGCTCATTTCTGGTATGAC      | CAGTGAGGGTCTCTCTTCTCCT  | 142 |
| GREM1   | TTAAGCAGACCATCCACGA        | TGTAGTTCAGGGCAGTTGAGT   | 190 |
| HHIP    | ATGGTGGGTTGTGCTTTCC        | AGTTGTGTTTGTGCTTTCTGCT  | 123 |
| IL6     | GGTACATCCTCGACGGCATCT      | GTGCCTCTTTGCTGCTTTCAC   | 81  |
| LPL     | CGAGTCGTCTTTCTCCTGATGAT    | TTCTGGATTCCAATGCTTCGA   | 91  |
| MAMDC2  | TCTTCAGAGAACTTCCACCTC      | CCATACACCATATGGGAGGC    | 200 |
| MMP1    | TGTGGACCATGCCATTGAGA       | TCTGCTTGACCCTCAGAGACC   | 87  |
| MMP12   | CGGGCAACTGGACACATCTACC     | GCTCCACGGGCAAAAACCAC    | 273 |
| OGN     | GTTGACATTGATGCTGTACCACCC   | GCTTGGGAGGAAGAAGTGA     | 241 |
| PCOLCE2 | TGCTGTCAGAGGAGCAGCTA       | GCAAAGGCTTGAAGGTGAAA    | 210 |
| S100A12 | CACATTCCTGTGCATTGAGG       | TGCAAGCTCCTTTGTAAGCA    | 167 |
| S100A2  | AGCTTTGTGGGGGAGAAAGT       | CAGTGATGAGTGCCAGGAAA    | 121 |
| SFTPA2  | GCCTGAAAAGAAGGAGCAGC       | GGCTTCCAACACAAACGTCC    | 124 |
| SFTPC   | AGCAAAGAGGTCCTGATGGA       | ACAATCACCACGACGATGAG    | 140 |
| SFTPD   | AAGTGGGCTTCCAGATGTTG       | CTGTGCCTCCGTAAATGGTT    | 181 |
| SPP1    | ACTCGAACGACTCTGATGATGT     | GTCAGGTCTGCGAACTTCTTA   | 224 |
| TNNC1   | CAGCAAAGGGAAATCTGAGG       | TGATGGTCTCGCCTGTAGC     | 122 |
| UBB     | GCTTTGTTGGGTGAGCTTGT       | CGAAGATCTGCATTTTGACCT   | 98  |
| WIF1    | GAAGGTTGGCATGGAAGA         | TGTAATTGGATTCAGGTGGA    | 145 |

**Table S6.** Univariate survival analyses (OS).

| Dataset  | Country     | Sample size | Cutoff  | HR   | Lower (95% CI) | Upper (95% CI) | Log-rank P |
|----------|-------------|-------------|---------|------|----------------|----------------|------------|
| GSE31210 | Japan       | 226         | 2.064   | 3.78 | 1.95           | 7.35           | 0.00025    |
| GSE42127 | USA         | 176         | 0.9113  | 2.94 | 1.067          | 8.093          | 0.02871    |
| LUAD     | USA         | 502         | 0.3566  | 2.43 | 1.33           | 4.42           | 0.0028     |
| GSE30219 | France      | 293         | 1.071   | 2.23 | 1.464          | 3.403          | 0.0001287  |
| GSE11969 | Japan       | 149         | 0.06185 | 1.87 | 0.9592         | 3.641          | 0.06181    |
| GSE50081 | Canada      | 181         | 1.28    | 1.76 | 1.015          | 3.066          | 0.04138    |
| GSE3141  | USA         | 111         | 2.103   | 1.74 | 0.9947         | 3.041          | 0.04933    |
| GSE37745 | Sweden      | 196         | 2.181   | 1.72 | 1.021          | 2.899          | 0.03904    |
| GSE41271 | USA         | 274         | 1.237   | 1.71 | 1.174          | 2.488          | 0.004628   |
| GSE68465 | USA         | 443         | 2.047   | 1.42 | 0.9886         | 2.033          | 0.05651    |
| GSE26939 | USA         | 115         | 0.1165  | 0.67 | 0.391          | 1.146          | 0.1411     |
| GSE19188 | Netherlands | 82          | 0.6477  | 0.66 | 0.3092         | 1.407          | 0.2781     |

**Table S7.** Univariate survival analyses (RFS).

| Dataset  | Country | Sample size | Cutoff | HR   | Lower (95% CI) | Upper (95% CI) | Log-rank P |
|----------|---------|-------------|--------|------|----------------|----------------|------------|
| GSE30219 | France  | 278         | 0.9589 | 4.08 | 1.66           | 10.01          | 0.00088    |
| GSE31210 | Japan   | 226         | 2.064  | 2.98 | 1.82           | 4.89           | 0.0000057  |
| GSE41271 | USA     | 274         | 1.848  | 2.53 | 1.23           | 5.19           | 0.0088     |
| GSE50081 | Canada  | 177         | 1.441  | 1.81 | 0.99           | 3.31           | 0.049      |
| GSE68465 | USA     | 359         | 2.038  | 1.7  | 1.15           | 2.5            | 0.0069     |
| GSE37745 | Sweden  | 96          | 1.908  | 1.69 | 0.96           | 2.97           | 0.064      |

**Table S8.** Multivariate survival analyses (TCGA).

| TCGA                                | N=481                   | HR     | Lower (95% CI) | Upper (95% CI) | Log-rank P |
|-------------------------------------|-------------------------|--------|----------------|----------------|------------|
| MMP Group (Cutoff = 0.3566)         | G1                      | 1      |                |                |            |
|                                     | G2                      | 1.9335 | 1.015          | 3.683          | 0.0449     |
| Age at initial pathologic diagnosis |                         | 1.0186 | 0.9991         | 1.038          | 0.0623     |
| Smoking Status                      | Lifelong non-smoker     | 1      |                |                |            |
|                                     | Current smoker          | 0.865  | 0.4184         | 1.788          | 0.6955     |
|                                     | Current reformed smoker | 1.465  | 0.7743         | 2.772          | 0.2405     |
| pStage                              | Stage1                  | 1      |                |                |            |
|                                     | Stage2                  | 2.8792 | 1.7525         | 4.73           | 0.0000298  |
|                                     | Stage3                  | 4.2344 | 2.5937         | 6.913          | 7.88E-09   |
|                                     | Stage4                  | 4.0642 | 2.01           | 8.218          | 0.0000949  |
| Gender                              | Female                  | 1      |                |                |            |
|                                     | Male                    | 0.8011 | 0.5341         | 1.202          | 0.2836     |

## SI References

1. Robin X, *et al.* (2011) pROC: an open-source package for R and S+ to analyze and compare ROC curves. *BMC Bioinformatics* 12:77.
2. Leek JT, Johnson WE, Parker HS, Jaffe AE, & Storey JD (2012) The sva package for removing batch effects and other unwanted variation in high-throughput experiments. *Bioinformatics* 28(6):882-883.
